# Supplementary material for: Mental Health Hospitalizations in Canadian Children, Adolescents, and Young Adults Over the COVID-19 Pandemic
Source: PubMed Central journal article supplement (PMC11231797; doi:10.1001/jamanetworkopen.2024.22833), 2024-07-08
Supplement: jamanetwopen-e2422833-s001.pdf [file jamanetwopen-e2422833-s001.pdf]

## Supplemental Online Content

Roumeliotis N, Carwana M, Trudeau O, et al. Mental health hospitalizations in Canadian children, adolescents, and young adults over the COVID-19 pandemic. *JAMA Netw Open*. 2024;7(7):e2422833. doi:10.1001/jamanetworkopen.2024.22833

**eTable 1.** National Ambulatory Care Reporting System (NACRS) Database, Number of Submitting Emergency Department by Province/Territory

**eTable 2.** *ICD-10* Codes for Mental Health Diagnostic Categories

**eTable 3.** Population Estimates for Canadian Children, Adolescents, and Young Adults Aged 6 to 21 Years Across the Study Period

**eTable 4.** Characteristics of Mental Health Hospitalizations by Fiscal Year

**eFigure 1.** Rates of Mental Health Hospitalizations by 10 000 Person-Years for Each Diagnostic Subgroup and Each Region, Including Territories

**eFigure 2.** Rates of Mental Health Hospitalizations by 10 000 Person-Years by Diagnostic Subgroup by Age Group

**eFigure 3.** Rates of Mental Health Hospitalizations by 10 000 Person-Years for Each Diagnostic Subgroup Stratified by Area (Urban/Rural)

**eTable 5.** Characteristics of Mental Health Emergency Department Visits Pre-COVID-19 and COVID-19-Prevalent Periods

**eTable 6.** Characteristics of Mental Health Emergency Department Visits by Fiscal Year (N = 881,765)

**eFigure 4.** Rates of Mental Health Emergency Department Visits by 10 000 Person-Years for Each Diagnostic Subgroup Stratified by Provinces (With Complete ED Reporting)

**eTable 7.** Emergency Department Visit Rate by 10 000 Person-Years, for Mental Health Disorders Pre-COVID-19 Period vs COVID-19-Prevalent Period (Ontario, Quebec, Alberta, and Yukon) by Sex

This supplemental material has been provided by the authors to give readers additional information about their work.

**eTable 1.** National Ambulatory Care Reporting System (NACRS) Database, Number of Submitting Emergency Department by Province/Territory

| Province / territory              | No. of submitting emergency department |
|-----------------------------------|----------------------------------------|
| Prince Edward Island              | 1                                      |
| Nova Scotia                       | 4                                      |
| Newfoundland and Labrador         | 0                                      |
| New Brunswick                     | 0                                      |
| Ontario                           | 179                                    |
| Manitoba                          | 0                                      |
| Saskatchewan                      | 10                                     |
| Alberta                           | 109                                    |
| British Columbia                  | 29                                     |
| Yukon                             | 3                                      |
| Northwest Territories and Nunavut | 0                                      |
| Total                             | 335                                    |

Data are complete for Ontario, Alberta, Yukon from CIHI.  
Data are complete from Quebec from INESSS.

**eTable 2. ICD-10 Codes for Mental Health Diagnostic Categories**

| Mental/Behavioural disorder group                                                                                                                                                                                                                                                                                                                                                | ICD-10 codes (range)                                                                                                                                                                              |
|----------------------------------------------------------------------------------------------------------------------------------------------------------------------------------------------------------------------------------------------------------------------------------------------------------------------------------------------------------------------------------|---------------------------------------------------------------------------------------------------------------------------------------------------------------------------------------------------|
| Suicide and self-harm                                                                                                                                                                                                                                                                                                                                                            | X60-84                                                                                                                                                                                            |
| Mood Disorders                                                                                                                                                                                                                                                                                                                                                                   | F30 - F33, F39, F340, F341, F348, F349, F380, F381, F388                                                                                                                                          |
| Schizophrenic/Psychotic Disorders                                                                                                                                                                                                                                                                                                                                                | F20 - F29                                                                                                                                                                                         |
| Anxiety Disorders                                                                                                                                                                                                                                                                                                                                                                | F40-F42, F430, F431, F438, F439, F930 - F932                                                                                                                                                      |
| Personality Disorders                                                                                                                                                                                                                                                                                                                                                            | F60 - F62, F68, F69                                                                                                                                                                               |
| Eating Disorders                                                                                                                                                                                                                                                                                                                                                                 | F50                                                                                                                                                                                               |
| Substance -related Disorders                                                                                                                                                                                                                                                                                                                                                     | F10 - F19, F55                                                                                                                                                                                    |
| Other mental/Behavioural Disorders:<br>Adjustment disorders (culture shock, grief reaction, hospitalism in children); dissociative disorders, specific developmental disorders of speech and language; specific developmental disorder of motor function;<br>behavioral/emotional disorders with onset usually in childhood and adolescence including TIC disorder, Autism, ADHD | All other mental health codes (F10-F99) not included in previous categories.<br><br>F43, F44, F45, F48, F59, F53, F54, F63 -65, F66, F70-73, F78 - F89, F90, F91, F92, F933 - F939, F94, F95, F99 |

ICD-10-CA = International Statistical Classification of Diseases and Related Health Problems, 10th Revision, Canada.  
Personality disorder diagnosis is restricted to patients age 18-20 years.

**eTable 3.** Population Estimates for Canadian Children, Adolescents, and Young Adults Aged 6 to 21 Years Across the Study Period

| Characteristic                          | Fiscal Year      |                  |                  |                  |                  |                  |                  |
|-----------------------------------------|------------------|------------------|------------------|------------------|------------------|------------------|------------------|
|                                         | 2016-17          | 2017-18          | 2018-19          | 2019-20          | 2020-21          | 2021-22          | 2022-23          |
| <b>Total</b>                            | 6 076 121        | 6 123 912        | 6 202 774        | 6 269 212        | 6 304 676        | 6 261 795        | 6 390 438        |
| <b>Age group</b>                        |                  |                  |                  |                  |                  |                  |                  |
| [6-12)                                  | 2 376 965 (39.1) | 2 412 801(39.4)  | 2 449 067 (39.5) | 2 474 268 (39.5) | 2 483 683 (39.4) | 2 477 877 (39.6) | 2 504 141 (39.2) |
| [12-18)                                 | 2 365 592 (38.9) | 2 369 205 (38.7) | 2 379 187 (38.4) | 2 406 949 (38.4) | 2 444 547 (38.8) | 2 468 893 (39.4) | 2 528 132 (39.6) |
| [18-21)                                 | 1 333 564 (21.9) | 1 341 906 (21.9) | 1 374 520 (22.2) | 1 387 995 (22.1) | 1 376 446 (21.8) | 1 315 025 (21.0) | 1 358 165 (21.3) |
| <b>Sex</b>                              |                  |                  |                  |                  |                  |                  |                  |
| Male                                    | 3 112 552 (51.2) | 3 136 107 (51.2) | 3 174 420 (51.2) | 3 207 157 (51.2) | 3 223 202 (51,1) | 3 198 994 (51.1) | 3 264 647 (51.1) |
| Female                                  | 2 963 569 (48.8) | 2 987 805 (48.8) | 3 028 354 (48.8) | 3 062 055 (48.8) | 3 081 474 (48,9) | 3 062 801 (48.9) | 3 125 791 (48.9) |
| <b>Area</b>                             |                  |                  |                  |                  |                  |                  |                  |
| Urban                                   | 5 058 041 (83.2) | 5 101 149 (83.3) | 5 174 741 (83.5) | 5 236 939 (83.5) | 5 269 412 (83.6) | 5 222 201 (83.4) | 5 334 041 (83.5) |
| Rural                                   | 1 018 080 (16.8) | 1 022 763 (16.7) | 1 028 033 (16.6) | 1 032 273 (16.5) | 1 035 264 (16.4) | 1 039 594 (16.6) | 1 056 397 (16.5) |
| <b>Material deprivation<sup>a</sup></b> |                  |                  |                  |                  |                  |                  |                  |
| 1 (least deprived)                      | 1 161 730 (19.2) | 1 170 846 (19.2) | 1 185 920 (19.2) | 1 198 617 (19.2) | 1 205 318 (19.2) | 1 197 023 (19.2) | 1 221 661 (19.2) |
| 2                                       | 1 228 287 (20.3) | 1 237 926 (20.3) | 1 253 863 (20.3) | 1 267 288 (20.3) | 1 274 372 (20.3) | 1 265 603 (20.3) | 1 291 652 (20.3) |
| 3                                       | 1 204 085 (19.9) | 1 213 533 (19.9) | 1 229 157 (19.9) | 1 242317 (19.9)  | 1 249 262 (19.9) | 1 240 665 (19.9) | 1 266 201 (19.9) |
| 4                                       | 1 179 882 (19.5) | 1 189 140 (19.5) | 1 204 450 (19.5) | 1 217 345 (19.5) | 1 224 151 (19.5) | 1 215 727 (19.5) | 1 240 750 (19.5) |
| 5 (most deprived)                       | 1 276 693 (21.1) | 1 286 711 (21.1) | 1 303 277 (21.1) | 1 317 230 (21.1) | 1 3245 94 (21.1) | 1 315 479 (21.1) | 1 342 555 (21.1) |
| <b>Provinces/Territories</b>            |                  |                  |                  |                  |                  |                  |                  |
| Prince Edward Island                    | 25 130 (0.4)     | 25 649 (0.4)     | 26 197 (0.4)     | 26 923 (0.4)     | 27 375 (0.4)     | 27 143 (0.4)     | 27 733 (0.4)     |
| New Brunswick                           | 118 559 (2.0)    | 118 689 (1.9)    | 119 277 (1.9)    | 12 0192 (1.9)    | 120 882 (1.9)    | 120 486 (1.9)    | 124 175 (1.9)    |
| Newfoundland and Labrador               | 80 834 (1.3)     | 80 378 (1.3)     | 79 556 (1.3)     | 78 688 (1.3)     | 77 997 (1.2)     | 76 720 (1.2)     | 77 683 (1.2)     |
| Nova Scotia                             | 146 620 (2.4)    | 146 599 (2.4)    | 147 034 (2.4)    | 14 7878 (2.4)    | 148 409 (2.4)    | 146 787 (2.3)    | 150 847 (2.4)    |
| Québec                                  | 1 287 873 (21.2) | 1 296 080 (21.2) | 1 313 282 (21.2) | 1 335 353 (21.3) | 1 356 037 (21.5) | 1 357 072 (21.7) | 1 375 050 (21.5) |
| Ontario                                 | 2 402 088 (39.5) | 2 417 569 (39.5) | 2 447 055 (39.5) | 2 462 779 (39.3) | 2 463 205 (39.1) | 2 427 970 (38.8) | 2 473 364 (38.7) |
| Manitoba                                | 252 362 (4.2)    | 255 843 (4.2)    | 259 606(4.2)     | 263 178 (4.2)    | 264 408 (4.2)    | 263 941 (4.2)    | 267 495 (4.2)    |
| Saskatchewan                            | 213 677 (3.5)    | 216 959 (3.5)    | 219 947 (3.5)    | 223 553 (3.6)    | 226 076 (3.6)    | 226 952 (3.6)    | 231 536 (3.6)    |

|                       | <b>2016-17</b> | <b>2017-18</b> | <b>2018-19</b> | <b>2019-20</b> | <b>2020-21</b> | <b>2021-22</b> | <b>2022-23</b> |
|-----------------------|----------------|----------------|----------------|----------------|----------------|----------------|----------------|
| Alberta               | 762 460 (12.5) | 772 576 (12.6) | 785 932 (12.7) | 798 805 (12.7) | 808 772 (12.8) | 812 930 (13.0) | 837 740 (13.1) |
| British Columbia      | 761 074 (12.5) | 767 814 (12.5) | 778 780 (12.6) | 785 448 (12.5) | 784 535 (12.4) | 774 495 (12.4) | 797 195 (12.5) |
| Yukon                 | 6256 (0.1)     | 6 425 (0.1)    | 6 575 (0.1)    | 6 653 (0.1)    | 6 849 (0.1)    | 7 007 (0.1)    | 7 158 (0.1)    |
| Northwest Territories | 8694 (0.1)     | 8 661 (0.1)    | 8 693 (0.1)    | 8 724 (0.1)    | 8 822 (0.1)    | 8 848 (0.1)    | 8 853 (0.1)    |
| Nunavut               | 10 494 (0.2)   | 10 670 (0.2)   | 10 840 (0.2)   | 11 038 (0.2)   | 11 309 (0.2)   | 11444 (0.2)    | 11 609 (0.2)   |

All numbers are expressed as a N (%) of column total.

a. Quintile Rankings: Lower scores correspond to areas least marginalized, while higher scores for each dimension relate to areas most marginalized.

**eTable 4.** Characteristics of Mental Health Hospitalizations by Fiscal Year

| Characteristic                             | Fiscal Year  |              |              |              |               |               |               |
|--------------------------------------------|--------------|--------------|--------------|--------------|---------------|---------------|---------------|
|                                            | 2016 - 2017  | 2017 - 2018  | 2018 - 2019  | 2019 - 2020  | 2020 - 2021   | 2021 - 2022   | 2022 - 2023   |
| Total                                      | 30 694       | 33 246       | 32 598       | 30 735       | 29 666        | 33567         | 27 595        |
| Sex <sup>a</sup> , n (%)                   |              |              |              |              |               |               |               |
| Female                                     | 19735 (64.3) | 21216 (63.9) | 20748 (63.7) | 19476 (63.4) | 20 004 (67.5) | 23 592 (70.4) | 18 928 (68.8) |
| Male                                       | 10941 (35.7) | 11990 (36.1) | 11816 (36.3) | 11241 (36.6) | 9620 (32.5)   | 9904 (29.6)   | 8587 (31.2)   |
| Age group, n (%)                           |              |              |              |              |               |               |               |
| 6-11                                       | 1822 (5.9)   | 2008 (6.0)   | 2084 (6.4)   | 1993 (6.5)   | 1632 (5.5)    | 1779 (5.3)    | 1424 (5.2)    |
| 12-17                                      | 20254 (66.0) | 21945 (66.0) | 21408 (65.7) | 20113 (65.4) | 19 808 (66.8) | 23272 (69.3)  | 19 006 (68.9) |
| 18-20                                      | 8618 (28.1)  | 9293 (28.0)  | 9106 (27.9)  | 8629 (27.9)  | 8226 (27.7)   | 8516 (25.4)   | 7165 (26.0)   |
| Rural address <sup>b</sup> , n (%)         | 6401 (21.6)  | 6940 (21.7)  | 6514 (20.9)  | 6138 (20.7)  | 5635 (19.6)   | 6290 (19.4)   | 5443 (20.2)   |
| Material deprivation quintile <sup>c</sup> |              |              |              |              |               |               |               |
| 1 (less deprived)                          | 4736 (16.6)  | 5229 (17.0)  | 5032 (16.8)  | 4946 (17.3)  | 5301 (19.2)   | 5921 (19.0)   | 4116 (17.3)   |
| 2                                          | 5593 (19.5)  | 5992 (19.4)  | 5954 (19.9)  | 5595 (19.6)  | 5571 (20.2)   | 6389 (20.6)   | 4611 (19.4)   |
| 3                                          | 5601 (19.6)  | 5978 (19.4)  | 5815 (19.4)  | 5511 (19.3)  | 5406 (19.6)   | 6167 (19.8)   | 4833 (20.3)   |
| 4                                          | 5719 (20.0)  | 6056 (19.6)  | 5843 (19.5)  | 5627 (19.7)  | 5364 (19.4)   | 5924 (19.1)   | 4844 (20.4)   |
| 5 (most deprived)                          | 6961 (24.3)  | 7576 (24.6)  | 7325 (24.4)  | 6908 (24.2)  | 5986 (21.7)   | 6685 (21.5)   | 5370 (22.6)   |
| Social deprivation quintile <sup>c</sup>   |              |              |              |              |               |               |               |
| 1 (less deprived)                          | 5726 (20.0)  | 6431 (20.8)  | 6179 (20.6)  | 5807 (20.3)  | 5741 (20.8)   | 6478 (20.8)   | 4478 (18.8)   |
| 2                                          | 6002 (21.0)  | 6152 (19.9)  | 6003 (20.0)  | 5745 (20.1)  | 5679 (20.5)   | 6531 (21.0)   | 4563 (19.2)   |
| 3                                          | 5593 (19.5)  | 6161 (20.0)  | 5900 (19.7)  | 5559 (19.4)  | 5628 (20.3)   | 6172 (19.8)   | 4609 (19.4)   |
| 4                                          | 5548 (19.4)  | 5969 (19.3)  | 5966 (19.9)  | 5688 (19.9)  | 5408 (19.6)   | 6163 (19.8)   | 5041 (21.2)   |
| 5 (most deprived)                          | 5780 (20.2)  | 6163 (20.0)  | 5966 (19.9)  | 5821 (20.3)  | 5202 (18.8)   | 5769 (18.5)   | 5117 (21.5)   |
| Province/Territories                       |              |              |              |              |               |               |               |
| Prince Edward Island                       | 276 (0.9)    | 261 (0.8)    | 270 (0.8)    | 247 (0.8)    | 110 (0.4)     | 195 (0.6)     | 109 (0.4)     |
| New Brunswick                              | 929 (3.0)    | 1016 (3.1)   | 1001 (3.1)   | 845 (2.7)    | 893 (3.0)     | 990 (2.9)     | 748 (2.7)     |
| Newfoundland and Labrador                  | 485 (1.6)    | 527 (1.6)    | 515 (1.6)    | 399 (1.3)    | 367 (1.2)     | 352 (1.0)     | 254 (0.9)     |
| Nova Scotia                                | 644 (2.1)    | 577 (1.7)    | 498 (1.5)    | 518 (1.7)    | 472 (1.6)     | 520 (1.5)     | 366 (1.3)     |
| Québec                                     | 5908 (19.2)  | 6468 (19.5)  | 6387 (19.6)  | 5965 (19.4)  | 5635 (19.0)   | 6480 (19.3)   | 5732 (20.8)   |
| Ontario                                    | 10098 (32.9) | 10696 (32.2) | 10481 (32.2) | 9652 (31.4)  | 9555 (32.2)   | 10804 (32.2)  | 9710 (35.2)   |

|                                            | 2016 - 2017  | 2017 - 2018  | 2018 - 2019  | 2019 - 2020  | 2020 - 2021  | 2021 - 2022  | 2022 - 2023  |
|--------------------------------------------|--------------|--------------|--------------|--------------|--------------|--------------|--------------|
| Manitoba                                   | 1123 (3.7)   | 1096 (3.3)   | 1122 (3.4)   | 1041 (3.4)   | 905 (3.1)    | 1066 (3.2)   | 846 (3.1)    |
| Saskatchewan                               | 2188 (7.1)   | 2352 (7.1)   | 2275 (7.0)   | 2045 (6.7)   | 1688 (5.7)   | 1964 (5.9)   | 1803 (6.5)   |
| Alberta                                    | 3932 (12.8)  | 4194 (12.6)  | 4116 (12.6)  | 4012 (13.1)  | 4198 (14.2)  | 4607 (13.7)  | 3869 (14.0)  |
| British Columbia                           | 4891 (15.9)  | 5766 (17.3)  | 5546 (17.0)  | 5696 (18.5)  | 5533 (18.7)  | 6245 (18.6)  | 3937 (14.3)  |
| Territories                                | 220 (0.7)    | 293 (0.9)    | 387 (1.2)    | 315 (1.0)    | 310 (1.0)    | 344 (1.0)    | 221 (0.8)    |
| Diagnostic subgroup, n (%)                 |              |              |              |              |              |              |              |
| Anxiety                                    | 3498 (11.4)  | 3920 (11.8)  | 4026 (12.4)  | 3981 (13.0)  | 4018 (13.5)  | 4651 (13.9)  | 3686 (13.4)  |
| Eating disorders                           | 1200 (3.9)   | 1192 (3.6)   | 1298 (4.0)   | 1294 (4.2)   | 2082 (7.0)   | 2347 (7.0)   | 1876 (6.8)   |
| Mood disorders                             | 7517 (24.5)  | 8329 (25.1)  | 7917 (24.3)  | 7244 (23.6)  | 6708 (22.6)  | 7684 (22.9)  | 5686 (20.6)  |
| Other mental/behavioral disorders          | 8457 (27.6)  | 9086 (27.3)  | 8708 (26.7)  | 8241 (26.8)  | 6642 (22.4)  | 7633 (22.7)  | 6360 (23.0)  |
| Personality disorders                      | 1601 (5.2)   | 1732 (5.2)   | 1835 (5.6)   | 1734 (5.6)   | 1750 (5.9)   | 2252 (6.7)   | 2131 (7.7)   |
| Schizophrenic/Psychotic                    | 2191 (7.1)   | 2161 (6.5)   | 2133 (6.5)   | 2085 (6.8)   | 2152 (7.3)   | 2186 (6.5)   | 1853 (6.7)   |
| Substance related disorders                | 2475 (8.1)   | 2604 (7.8)   | 2580 (7.9)   | 2463 (8.0)   | 2418 (8.2)   | 2153 (6.4)   | 1900 (6.9)   |
| Suicide and self-harm                      | 3755 (12.2)  | 4222 (12.7)  | 4101 (12.6)  | 3693 (12.0)  | 3896 (13.1)  | 4661 (13.9)  | 4103 (14.9)  |
| Transfer between centers, n (%)            | 3840 (12.5)  | 3869 (11.6)  | 4504 (13.8)  | 4051 (13.2)  | 4467 (15.1)  | 5169 (15.4)  | 4355 (15.8)  |
| Pediatric center <sup>d</sup> , n (%)      |              |              |              |              |              |              |              |
| Yes                                        | 6697 (21.8)  | 6960 (20.9)  | 6981 (21.4)  | 6557 (21.3)  | 7319 (24.7)  | 8514 (25.4)  | 6848 (24.8)  |
| No                                         | 23997 (78.2) | 26286 (79.1) | 25617 (78.6) | 24178 (78.7) | 22347 (75.3) | 25053 (74.6) | 20747 (75.2) |
| Mental health visit in last 2 years, n (%) |              |              |              |              |              |              |              |
| None                                       | 14208 (46.3) | 15138 (45.5) | 14400 (44.2) | 13671 (44.5) | 13280 (44.8) | 15056 (44.9) | 11635 (42.2) |
| Emergency Department visit                 | 8860 (28.9)  | 9865 (29.7)  | 9922 (30.4)  | 9310 (30.3)  | 8933 (25.1)  | 10338 (24.4) | 9091 (24.9)  |
| Hospitalization                            | 7626 (24.8)  | 8243 (24.8)  | 8276 (25.4)  | 7754 (25.2)  | 7453 (30.1)  | 8173 (30.8)  | 6869 (32.9)  |

a. Sex other n=303 (0.1%), not shown

b. Missing Urban/rural designation n=7413 (3.4%)

c. Missing Material and Social deprivation for n= 17 616 (8.1%) and n=17 363 (8.0%) respectively.

d. Defined as a tertiary center with a pediatric intensive care unit

**eFigure 1.** Rates of Mental Health Hospitalizations by 10 000 Person-Years for Each Diagnostic Subgroup and Each Region, Including Territories

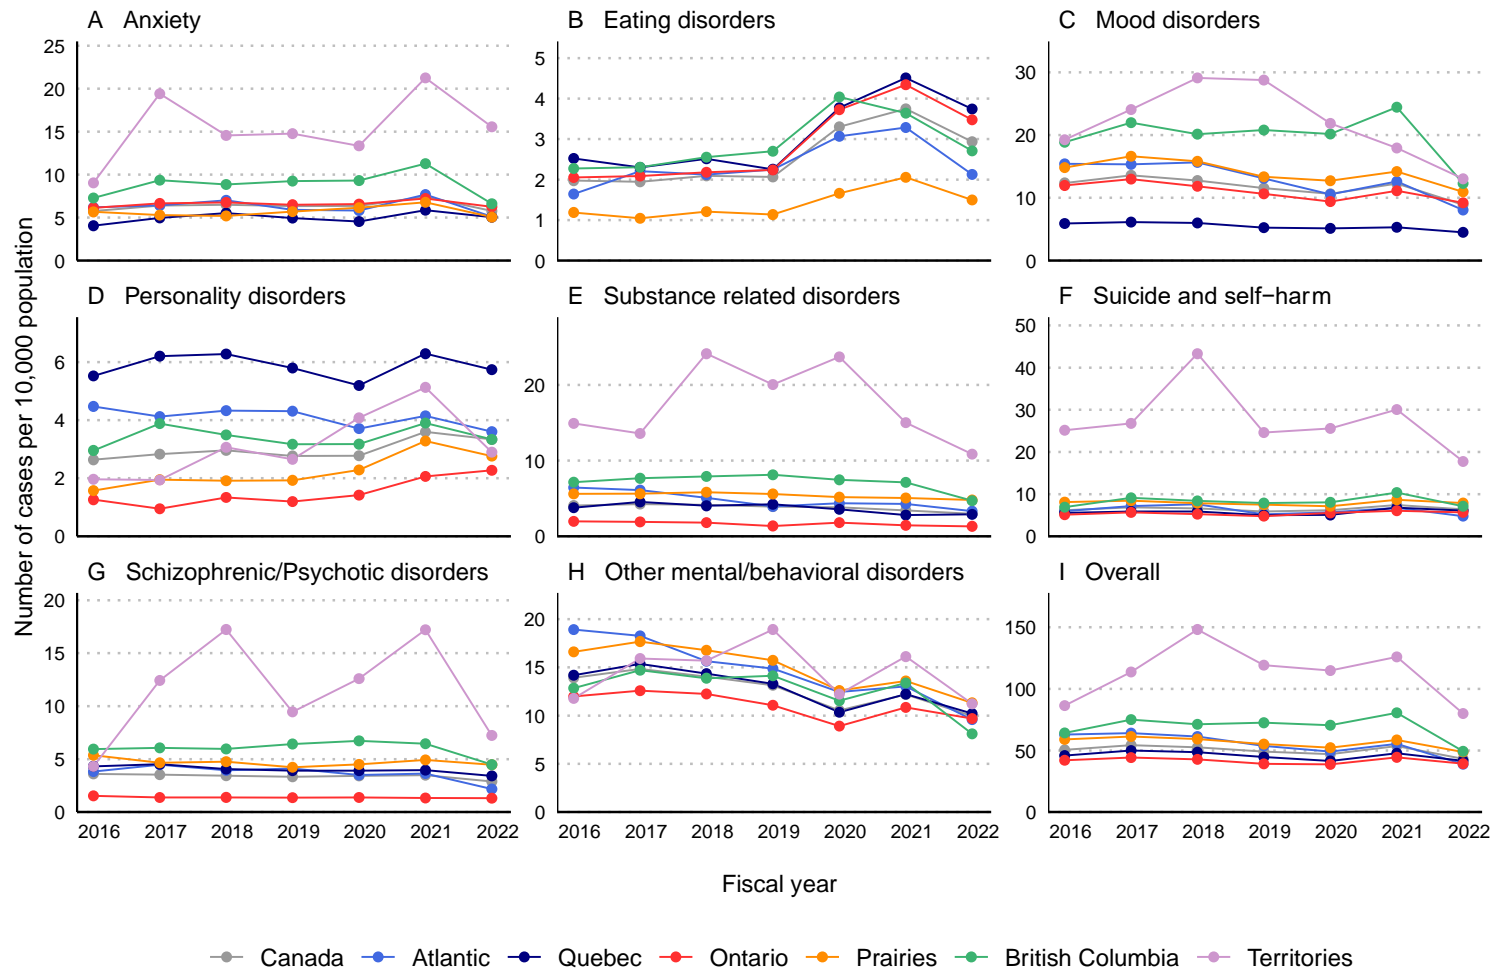

Points correspond to aggregate data by fiscal year, and are displayed at the beginning of the fiscal year.



**eFigure 2.** Rates of Mental Health Hospitalizations by 10 000 Person-Years by Diagnostic Subgroup by Age Group

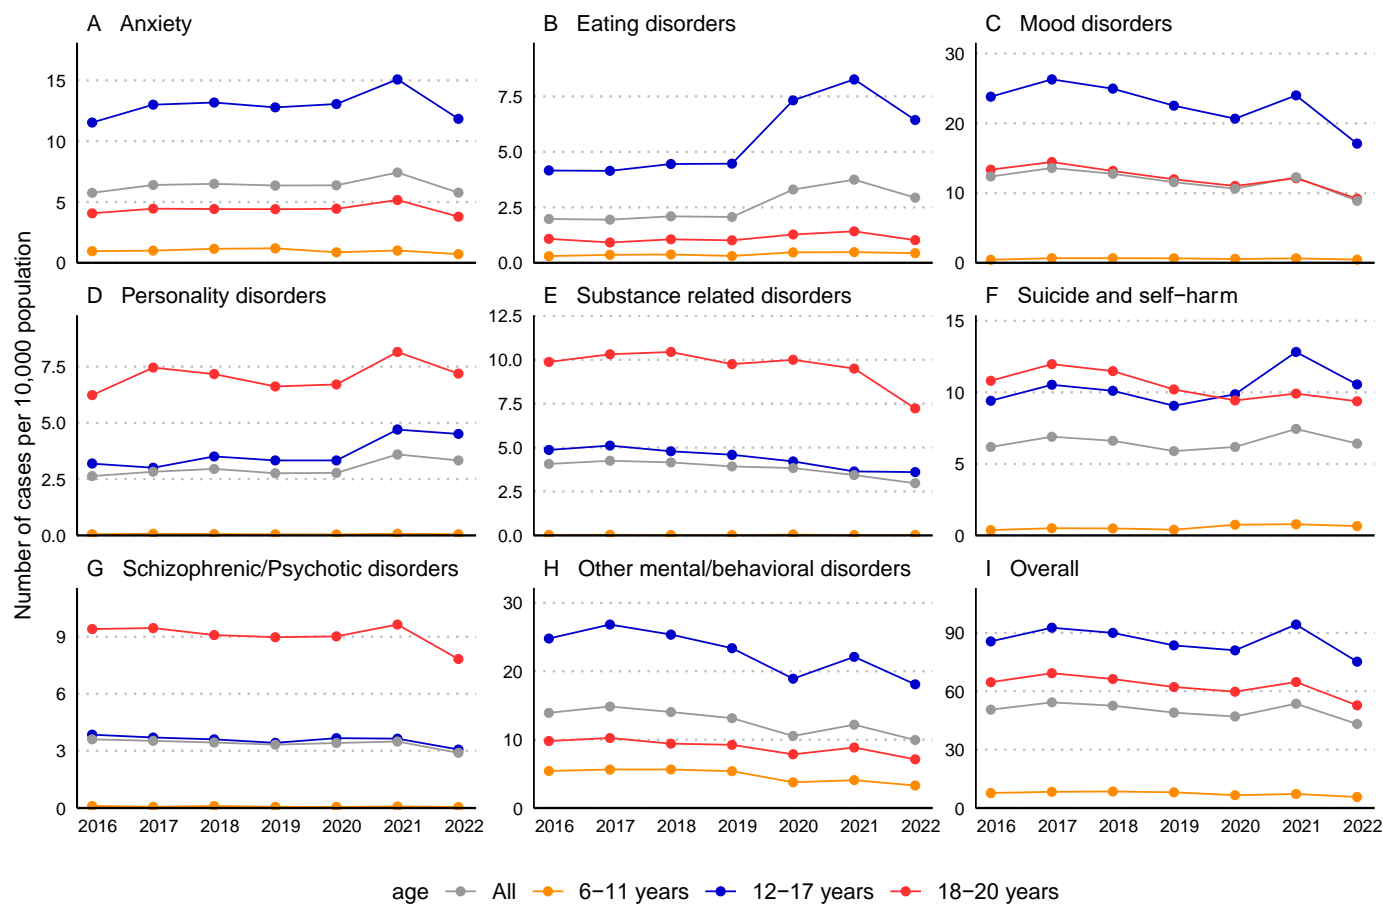

Points correspond to aggregate data by fiscal year, and are displayed at the beginning of the fiscal year.

**eFigure 3.** Rates of Mental Health Hospitalizations by 10 000 Person-Years for Each Diagnostic Subgroup Stratified by Area (Urban/Rural)

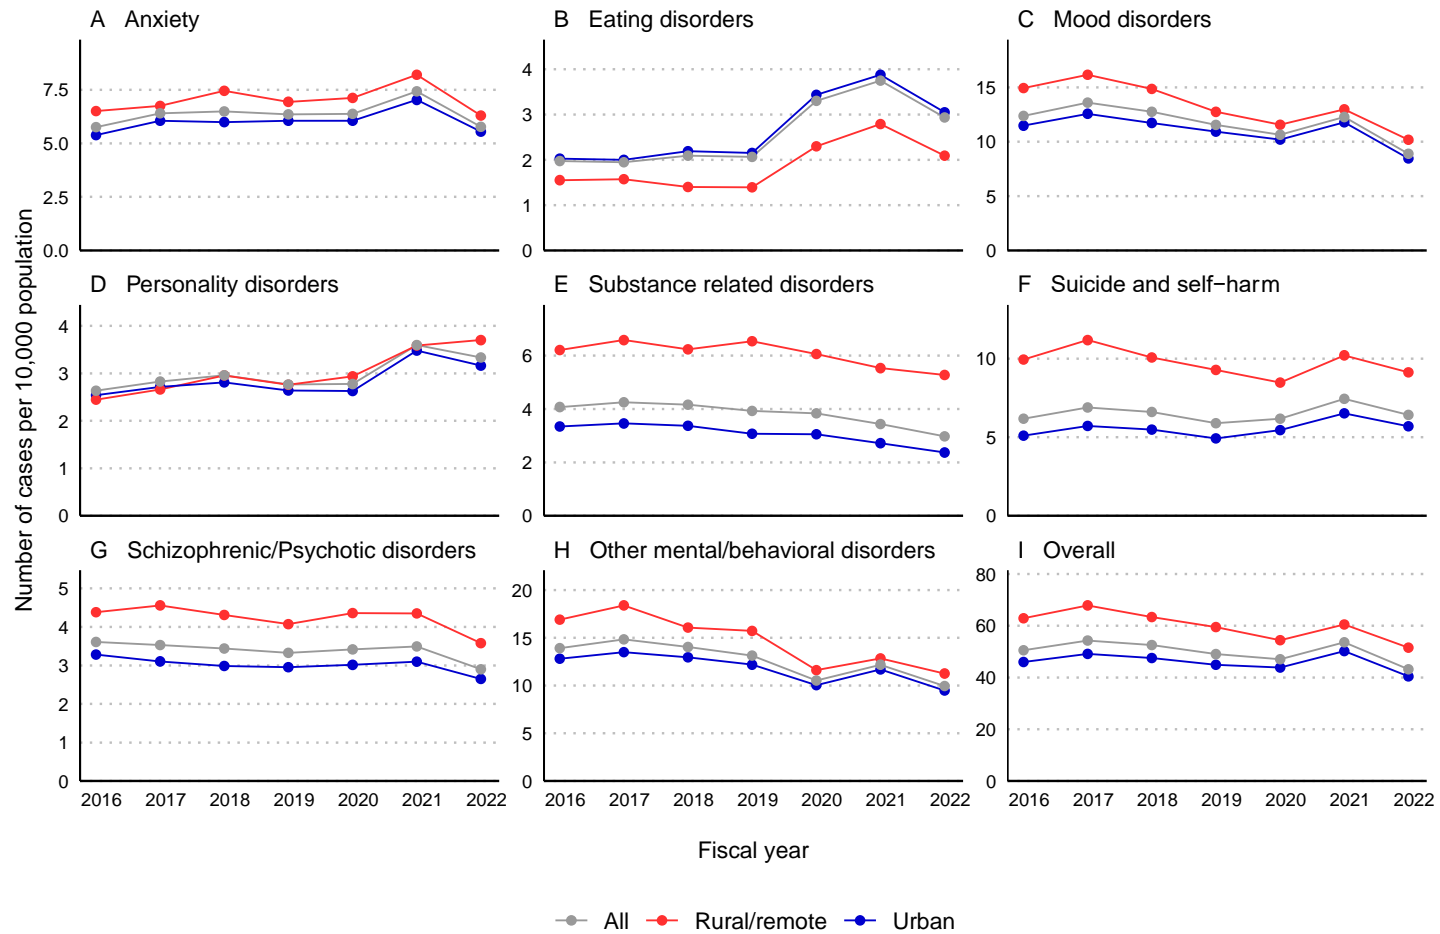

Points correspond to aggregate data by fiscal year, and are displayed at the beginning of the fiscal year.

**eTable 5.** Characteristics of Mental Health Emergency Department Visits Pre–COVID-19 and COVID-19–Prevalent Periods

| Characteristic                                     | Overall<br>(N = 881 765) | Pre-COVID<br>(n = 528 280) | COVID-prevalent<br>(n = 353 485) | P value         |
|----------------------------------------------------|--------------------------|----------------------------|----------------------------------|-----------------|
| Sex <sup>a</sup> , n (%)                           |                          |                            |                                  |                 |
| Female                                             | 549 100 (62.3)           | 316 953 (60.0)             | 232 147 (65.8)                   | <b>&lt;.001</b> |
| Male                                               | 331 867 (37.7)           | 210 974 (40.0)             | 120 893 (34.2)                   |                 |
| Age group, n (%)                                   |                          |                            |                                  |                 |
| 6-11 years                                         | 61 676 (7.0)             | 36 703 (6.9)               | 24 973 (7.1)                     | <b>&lt;.001</b> |
| 12-17 years                                        | 429 635 (48.7)           | 243 272 (46.0)             | 186 363 (52.7)                   |                 |
| 18-20 years                                        | 390 454 (44.3)           | 248 305 (47.0)             | 142 149 (40.2)                   |                 |
| Rural address <sup>b</sup> , n (%)                 | 138 220 (16.8)           | 81 267 (16.7)              | 56 953 (17.0)                    | <b>0.007</b>    |
| Material deprivation quintile <sup>c</sup> , n (%) |                          |                            |                                  |                 |
| 1 (less deprived)                                  | 151 622 (21.2)           | 88 851 (21.3)              | 62 771 (21.0)                    | <b>&lt;.001</b> |
| 2                                                  | 151 043 (19.1)           | 90 559 (19.0)              | 60 484 (19.2)                    |                 |
| 3                                                  | 150 629 (18.5)           | 89 170 (18.4)              | 61 459 (18.7)                    |                 |
| 4                                                  | 151 287 (19.8)           | 90 417 (19.7)              | 60 870 (20.0)                    |                 |
| 5 (most deprived)                                  | 179 116 (21.3)           | 109 210 (21.5)             | 69 906 (21.1)                    |                 |
| Province/Territories <sup>d</sup> , n (%)          |                          |                            |                                  |                 |
| Prince Edward Island                               | 1 996 (0.2)              | 1 088 (0.2)                | 908 (0.3)                        | <b>&lt;.001</b> |
| Nova Scotia                                        | 10 372 (1.2)             | 5 870 (1.1)                | 4 502 (1.3)                      |                 |
| Quebec                                             | 266 919 (30.3)           | 161 306 (30.5)             | 105 613 (29.9)                   |                 |
| Ontario                                            | 378 546 (42.9)           | 231 464 (43.8)             | 147 082 (41.6)                   |                 |
| Saskatchewan                                       | 31 901 (3.6)             | 17 294 (3.3)               | 14 607 (4.1)                     |                 |
| Alberta                                            | 141 879 (16.1)           | 82 579 (15.6)              | 59 300 (16.8)                    |                 |
| British Columbia                                   | 47 908 (5.4)             | 27 382 (5.2)               | 20 526 (5.8)                     |                 |
| Yukon                                              | 2 244 (0.3)              | 1 297 (0.2)                | 947 (0.3)                        |                 |
| Diagnostic subgroup, n (%)                         |                          |                            |                                  |                 |
| Anxiety                                            | 237 773 (27.0)           | 138 135 (26.1)             | 99 638 (28.2)                    | <b>&lt;.001</b> |
| Eating disorders                                   | 8 197 (0.9)              | 3 088 (0.6)                | 5 109 (1.4)                      |                 |
| Mood disorders                                     | 162 745 (18.5)           | 99 543 (18.8)              | 63 202 (17.9)                    |                 |
| Other mental disorders                             | 158 533 (18.0)           | 91 954 (17.4)              | 66 579 (18.8)                    |                 |
| Personality disorders                              | 36 975 (4.2)             | 22 164 (4.2)               | 14 811 (4.2)                     |                 |
| Schizophrenic/Psychotic                            | 30 473 (3.5)             | 18 056 (3.4)               | 12 417 (3.4)                     |                 |
| Substance related disorders                        | 139 719 (15.8)           | 95 615 (18.1)              | 44 104 (18.1)                    |                 |
| Suicide and self-harm <sup>e</sup>                 | 107 350 (12.2)           | 59 725 (11.3)              | 47 625 (11.3)                    |                 |
| Transfer between centers, n (%)                    | 177 125 (20.1)           | 101 688 (19.2)             | 75 437 (21.3)                    | <b>&lt;.001</b> |
| Admitted in pediatric center <sup>f</sup> , n (%)  |                          |                            |                                  |                 |
| Yes                                                | 167 682 (19.0)           | 84 556 (16.0)              | 83 126 (23.5)                    | <b>&lt;.001</b> |
| No                                                 | 714083 (81.0)            | 443724 (84.0)              | 270359 (76.5)                    |                 |
| Mental health visit in last 2 years, n (%)         |                          |                            |                                  |                 |
| ED visit                                           | 266 805 (30.3)           | 158 118 (29.9)             | 108 687 (30.7)                   | <b>&lt;.001</b> |
| Hospitalization                                    | 108 431 (12.3)           | 62 588 (11.8)              | 45 843 (13.0)                    |                 |
| None                                               | 506 529 (57.4)           | 307 574 (58.2)             | 198 955 (56.3)                   |                 |

| Characteristic                    | Overall<br>(N = 881 765) | Pre-COVID<br>(n =528 280) | COVID-prevalent<br>(n = 353 485) | P value         |
|-----------------------------------|--------------------------|---------------------------|----------------------------------|-----------------|
| Triage level <sup>g</sup> , n (%) |                          |                           |                                  |                 |
| Resuscitation                     | 12 730 (1.4)             | 7 418 (1.4)               | 5 312 (1.5)                      | <b>&lt;.001</b> |
| Emergent                          | 299 875 (34.1)           | 175 252 (33.3)            | 124 623 (35.4)                   |                 |
| Urgent                            | 407 170 (46.4)           | 244 217 (46.4)            | 162 953 (46.2)                   |                 |
| Less urgent (semi-urgent)         | 132 812 (15.1)           | 82 683 (15.7)             | 50 129 (14.2)                    |                 |
| Non-urgent                        | 25 641 (2.9)             | 16 202 (3.1)              | 9 439 (2.7)                      |                 |

Pre-COVID: April 1, 2016, to March 31, 2020; COVID-prevalent: April 1, 2020, to March 31, 2023.

ED: Emergency Department

\*P-values are from chi-square test of independence between pre- and COVID-prevalent columns for both Hospitalizations and ED visits

a. Sex other n=798 (0.1%), not shown

b. Missing Urban/rural designation n= 59 840 (6.8%)

c. Missing Material deprivation for n=98 068 (11.1%)

d. ED data partially complete for Prince Edward Island (PEI), Nova Scotia (NS), Manitoba, Saskatchewan and British Columbia (BC); not mandated in Newfoundland (NF) and Labrador, New Brunswick (NB), the Northwest Territories and Nunavut.

e. Suicide and self-harm numbers for Quebec not included due to inconsistent coding

f. Defined as a tertiary center with a pediatric intensive care unit.

g. Triage level unknown for n=3537 (0.0%)

**eTable 6.** Characteristics of Mental Health Emergency Department Visits by Fiscal Year (N = 881,765)

| Characteristic                                     | Fiscal Year  |              |              |              |              |              |              |
|----------------------------------------------------|--------------|--------------|--------------|--------------|--------------|--------------|--------------|
|                                                    | 2016 - 2017  | 2017 - 2018  | 2018 - 2019  | 2019 - 2020  | 2020 - 2021  | 2021 - 2022  | 2022 - 2023  |
| Total                                              | 125 562      | 137 119      | 137 403      | 128 196      | 105 068      | 130 625      | 117 792      |
| Sex <sup>a</sup> , n (%)                           |              |              |              |              |              |              |              |
| Female                                             | 74963 (59.7) | 81756 (59.7) | 83384 (60.7) | 76850 (60.0) | 66806 (63.6) | 87514 (67.1) | 77827 (66.2) |
| Male                                               | 50574 (40.3) | 55260 (40.3) | 53903 (39.3) | 51237 (40.0) | 38195 (36.4) | 42958 (32.9) | 39740 (33.8) |
| Age group, n (%)                                   |              |              |              |              |              |              |              |
| 6-11 years                                         | 8292 (6.6)   | 9106 (6.6)   | 9837 (7.2)   | 9468 (7.4)   | 7535 (7.2)   | 9374 (7.2)   | 8064 (6.8)   |
| 12-17 years                                        | 56112 (44.7) | 63654 (46.4) | 63015 (45.9) | 60491 (47.2) | 53577 (51.0) | 70442 (53.9) | 62344 (52.9) |
| 18-20 years                                        | 61158 (48.7) | 64359 (46.9) | 64551 (47.0) | 58237 (45.4) | 43956 (41.8) | 50809 (38.9) | 47384 (40.2) |
| Rural address <sup>b</sup> , n (%)                 | 19148 (16.7) | 20710 (16.5) | 21214 (16.9) | 20195 (16.9) | 17120 (16.9) | 20619 (16.6) | 19214 (17.3) |
| Material deprivation quintile <sup>c</sup> , n (%) |              |              |              |              |              |              |              |
| 1 (less deprived)                                  | 20810 (18.8) | 23492 (19.4) | 22836 (18.9) | 21713 (18.9) | 19163 (19.7) | 24862 (21.0) | 18746 (18.8) |
| 2                                                  | 21386 (19.3) | 23331 (19.2) | 23707 (19.6) | 22135 (19.2) | 18906 (19.5) | 23303 (19.6) | 18275 (18.3) |
| 3                                                  | 21342 (19.3) | 22960 (18.9) | 23122 (19.1) | 21746 (18.9) | 18913 (19.5) | 23055 (19.4) | 19491 (19.5) |
| 4                                                  | 20968 (18.9) | 23739 (19.6) | 23189 (19.2) | 22521 (19.6) | 18320 (18.9) | 22516 (19.0) | 20034 (20.1) |
| 5 (most deprived)                                  | 26176 (23.6) | 27873 (23.0) | 28155 (23.3) | 27006 (23.5) | 21830 (22.5) | 24869 (21.0) | 23207 (23.3) |
| Province/Territories <sup>d</sup> , n (%)          |              |              |              |              |              |              |              |
| Alberta                                            | 19673 (15.7) | 21321 (15.5) | 21460 (15.6) | 20125 (15.7) | 18265 (17.4) | 21965 (16.8) | 19070 (16.2) |
| British Columbia                                   | 6109 (4.9)   | 6885 (5.0)   | 7360 (5.4)   | 7028 (5.5)   | 6394 (6.1)   | 7566 (5.8)   | 6566 (5.6)   |
| Nova Scotia                                        | 1444 (1.2)   | 1566 (1.1)   | 1500 (1.1)   | 1360 (1.1)   | 1347 (1.3)   | 1704 (1.3)   | 1451 (1.2)   |
| Ontario                                            | 55819 (44.5) | 60666 (44.2) | 59147 (43.0) | 55832 (43.6) | 45164 (43.0) | 53609 (41.0) | 48309 (41.0) |
| Prince Edward Island                               | 265 (0.2)    | 255 (0.2)    | 291 (0.2)    | 277 (0.2)    | 292 (0.3)    | 319 (0.2)    | 297 (0.3)    |
| Quebec                                             | 38561 (30.7) | 41735 (30.4) | 42739 (31.1) | 38271 (29.9) | 28921 (27.5) | 40005 (30.6) | 36687 (31.1) |
| Saskatchewan                                       | 3383 (2.7)   | 4409 (3.2)   | 4553 (3.3)   | 4949 (3.9)   | 4395 (4.2)   | 5118 (3.9)   | 5094 (4.3)   |
| Yukon                                              | 308 (0.2)    | 282 (0.2)    | 353 (0.3)    | 354 (0.3)    | 290 (0.3)    | 339 (0.3)    | 318 (0.3)    |
| Diagnostic subgroup, n (%)                         |              |              |              |              |              |              |              |
| Anxiety                                            | 33065 (26.3) | 34406 (25.1) | 35184 (25.6) | 35480 (27.7) | 31801 (30.3) | 36748 (28.1) | 31089 (26.4) |
| Eating disorders                                   | 662 (0.5)    | 793 (0.6)    | 854 (0.6)    | 779 (0.6)    | 1471 (1.4)   | 2110 (1.6)   | 1528 (1.3)   |

| <b>Characteristic</b>                               | <b>2016 - 2017</b> | <b>2017 - 2018</b> | <b>2018 - 2019</b> | <b>2019 - 2020</b> | <b>2020 - 2021</b> | <b>2021 - 2022</b> | <b>2022 - 2023</b> |
|-----------------------------------------------------|--------------------|--------------------|--------------------|--------------------|--------------------|--------------------|--------------------|
| Mood disorders                                      | 23034 (18.3)       | 26183 (19.1)       | 25814 (18.8)       | 24512 (19.1)       | 18513 (17.6)       | 24026 (18.4)       | 20663 (17.5)       |
| Other mental disorders                              | 20560 (16.4)       | 23510 (17.1)       | 24664 (18.0)       | 23220 (18.1)       | 19075 (18.2)       | 24746 (18.9)       | 22758 (19.3)       |
| Personality disorders                               | 5347 (4.3)         | 5761 (4.2)         | 5801 (4.2)         | 5255 (4.1)         | 4201 (4.0)         | 5285 (4.0)         | 5325 (4.5)         |
| Schizophrenic/Psychotic                             | 4841 (3.9)         | 4570 (3.3)         | 4440 (3.2)         | 4205 (3.3)         | 4156 (4.0)         | 4332 (3.3)         | 3929 (3.3)         |
| Substance related disorders                         | 23960 (19.1)       | 26100 (19.0)       | 25024 (18.2)       | 20531 (16.0)       | 12361 (11.8)       | 15538 (11.9)       | 16205 (13.8)       |
| Suicide and self-harm <sup>e</sup>                  | 14093 (11.2)       | 15796 (11.5)       | 15622 (11.4)       | 14214 (11.1)       | 13490 (12.8)       | 17840 (13.7)       | 16295 (13.8)       |
| Transfer between centers, n (%)                     | 24403 (19.4)       | 26584 (19.4)       | 26279 (19.1)       | 24422 (19.1)       | 23845 (22.7)       | 27554 (21.1)       | 24038 (20.4)       |
| Admitted to a pediatric center <sup>f</sup> , n (%) |                    |                    |                    |                    |                    |                    |                    |
| Yes                                                 | 18884 (15.0)       | 21069 (15.4)       | 21856 (15.9)       | 22747 (17.7)       | 23449 (22.3)       | 32399 (24.8)       | 27278 (23.2)       |
| No                                                  | 106678 (85.0)      | 116050 (84.6)      | 115547 (84.1)      | 105449 (82.3)      | 81619 (77.7)       | 98226 (75.2)       | 90514 (76.8)       |
| Mental health visit last 2 years, n (%)             |                    |                    |                    |                    |                    |                    |                    |
| Emergency Department visit                          | 36334 (28.9)       | 40655 (29.6)       | 41447 (30.2)       | 39682 (31.0)       | 33482 (31.9)       | 39177 (30.0)       | 36028 (30.6)       |
| Hospitalization                                     | 15198 (12.1)       | 16102 (11.7)       | 16030 (11.7)       | 15258 (11.9)       | 13645 (13.0)       | 16512 (12.6)       | 15686 (13.3)       |
| None                                                | 74030 (59.0)       | 80362 (58.6)       | 79926 (58.2)       | 73256 (57.1)       | 57941 (55.1)       | 74936 (57.4)       | 66078 (56.1)       |
| Triage level <sup>g</sup> , n (%)                   |                    |                    |                    |                    |                    |                    |                    |
| Resuscitation                                       | 1862 (1.5)         | 1755 (1.3)         | 1898 (1.4)         | 1903 (1.5)         | 1488 (1.4)         | 1902 (1.5)         | 1922 (1.6)         |
| Emergent                                            | 40457 (32.3)       | 45827 (33.6)       | 45318 (33.2)       | 43650 (34.2)       | 36106 (34.5)       | 46416 (35.6)       | 42101 (35.9)       |
| Urgent                                              | 58205 (46.5)       | 63919 (46.8)       | 63819 (46.7)       | 58274 (45.6)       | 48715 (46.5)       | 60374 (46.3)       | 53864 (45.9)       |
| Less urgent (semi-urgent)                           | 20262 (16.2)       | 20683 (15.2)       | 21543 (15.8)       | 20195 (15.8)       | 15669 (15.0)       | 18283 (14.0)       | 16177 (13.8)       |
| Non-urgent                                          | 4290 (3.4)         | 4309 (3.2)         | 3955 (2.9)         | 3648 (2.9)         | 2810 (2.7)         | 3282 (2.5)         | 3347 (2.9)         |

a. Sex other/Unspecified n=798 (0.1%), not shown

b. Missing Urban/rural designation n= 59 840 (6.8%)

c. Missing Material Deprivation quintile for n=98 068 (11.1%)

d. ED data partially complete for Prince Edward Island (PEI), Nova Scotia (NS), Manitoba, Saskatchewan and British Columbia (BC); not mandated in Newfoundland (NF) and Labrador, New Brunswick (NB), the Northwest Territories and Nunavut.

e. Suicide and self-harm numbers for Quebec not included due to inconsistent coding

f. Defined as a tertiary center with a pediatric intensive care unit

g. Triage level unknown for n=3537 (0.0%)

**eFigure 4.** Rates of Mental Health Emergency Department Visits by 10 000 Person-Years for Each Diagnostic Subgroup Stratified by Provinces (With Complete ED Reporting)

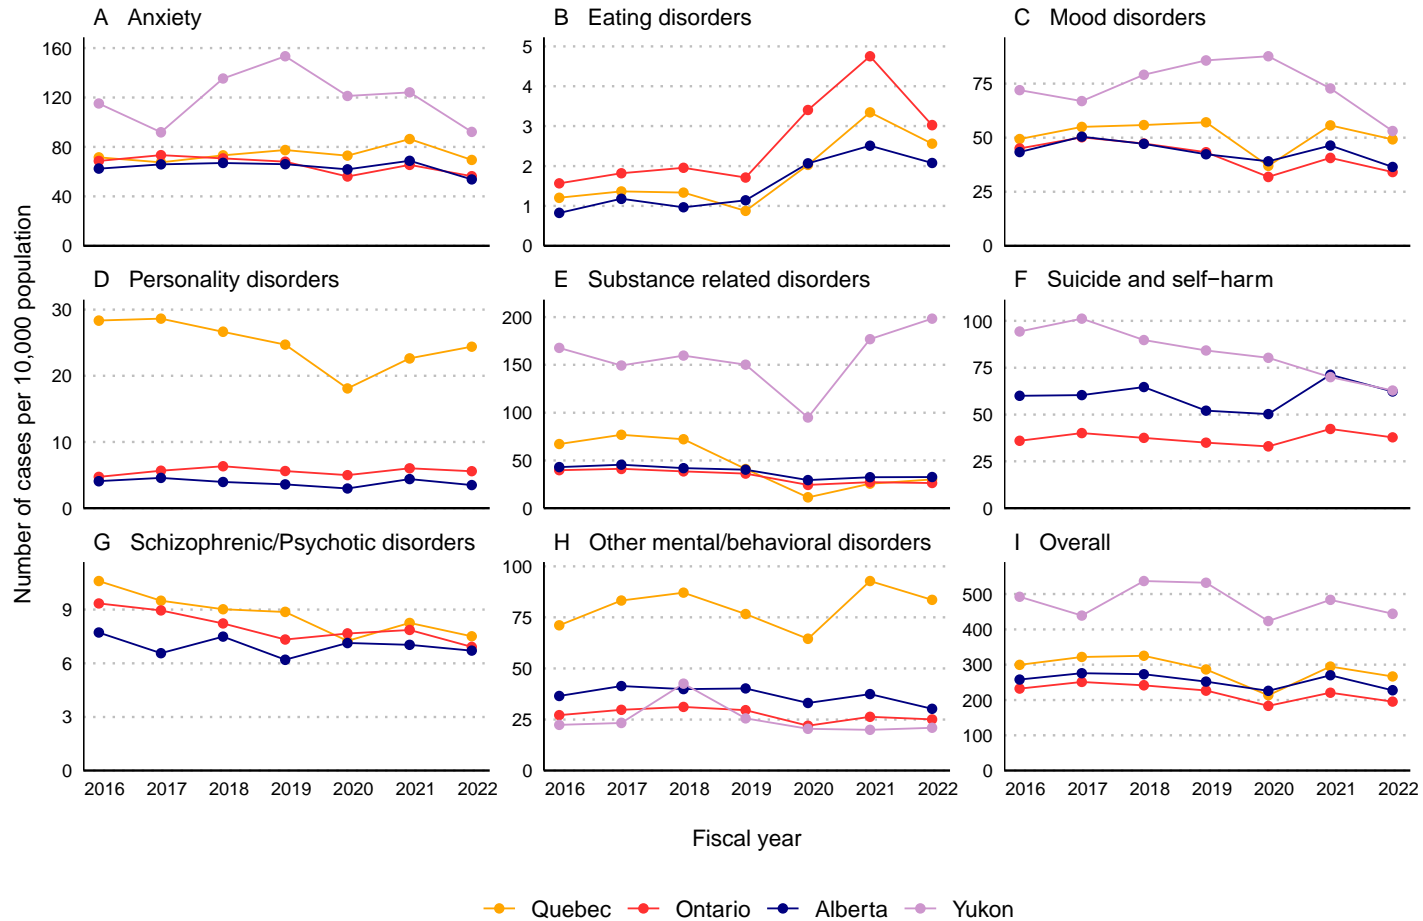

ED: Emergency Department  
 Points correspond to aggregate data by fiscal year, and are displayed at the beginning of the fiscal year.  
 Low counts for Yukon territory

**eTable 7.** Emergency Department Visit Rate by 10 000 Person-Years, for Mental Health Disorders Pre-COVID-19 Period vs COVID-19-Prevalent Period (Ontario, Quebec, Alberta, and Yukon) by Sex

| Diagnostic subgroup                      | Pre-COVID | COVID-prevalent | Rate ratio (95% CI) |
|------------------------------------------|-----------|-----------------|---------------------|
| <b>Anxiety</b>                           | 70.07     | 64.63           | 0.92 (0.91, 0.93)   |
| Male                                     | 50.40     | 41.00           | 0.81 (0.80, 0.83)   |
| Female                                   | 90.67     | 89.32           | 0.99 (0.97, 1.00)   |
| <b>Eating disorders</b>                  | 1.47      | 3.13            | 2.13 (2.03, 2.23)   |
| Male                                     | 0.33      | 0.48            | 1.45 (1.24, 1.70)   |
| Female                                   | 2.67      | 5.91            | 2.21 (2.10, 2.33)   |
| <b>Mood</b>                              | 48.61     | 39.86           | 0.82 (0.81, 0.83)   |
| Male                                     | 31.66     | 22.62           | 0.71 (0.70, 0.73)   |
| Female                                   | 66.37     | 57.88           | 0.87 (0.86, 0.88)   |
| <b>Personality</b>                       | 11.51     | 9.93            | 0.86 (0.84, 0.88)   |
| Male                                     | 6.85      | 5.28            | 0.77 (0.74, 0.80)   |
| Female                                   | 16.40     | 14.78           | 0.90 (0.88, 0.92)   |
| <b>Schizophrenic/Psychotic</b>           | 8.50      | 7.45            | 0.88 (0.85, 0.90)   |
| Male                                     | 11.38     | 9.45            | 0.83 (0.81, 0.86)   |
| Female                                   | 5.49      | 5.35            | 0.98 (0.93, 1.02)   |
| <b>Substance related</b>                 | 47.02     | 26.13           | 0.56 (0.55, 0.56)   |
| Male                                     | 45.31     | 24.66           | 0.54 (0.53, 0.55)   |
| Female                                   | 48.80     | 27.67           | 0.57 (0.56, 0.58)   |
| <b>Suicide and self-harm<sup>a</sup></b> | 42.56     | 43.56           | 1.02 (1.01, 1.04)   |
| Male                                     | 29.00     | 25.48           | 0.88 (0.86, 0.90)   |
| Female                                   | 56.79     | 62.48           | 1.10 (1.08, 1.12)   |
| <b>Other<sup>b</sup></b>                 | 45.61     | 42.41           | 0.93 (0.92, 0.94)   |
| Male                                     | 38.59     | 28.05           | 0.73 (0.71, 0.74)   |
| Female                                   | 52.97     | 57.42           | 1.08 (1.07, 1.10)   |

Gray shaded lines highlight a significant increase in Emergency Department (ED) visit rate during COVID-prevalent period  
Provinces reported above have complete ED reporting

CI: Confidence interval

a. For suicide and self-harm only Alberta, Ontario et Yukon included.

b. Other includes adjustment disorder, dissociative disorders, Attention deficit and hyperactivity, tic disorders and other behavioural disorders
